# Supplementary material
Source: PubMed Central journal article supplement (PMC3041864)
Supplement: NIHMS260211-supplement-1.pdf [file NIHMS260211-supplement-1.pdf]

## Supplementary Materials



**Supplementary Figure 1.** Functional independence of the HIF-1 $\alpha$ -ARNT pathway and the HIF-1 $\alpha$ -c-Myc pathway. *A* and *B*, U-2 OS cells and those transduced with HIF-1 $\alpha$  variants were assayed for target gene expression of the HIF-1 $\alpha$ -ARNT pathway (*CA9* and *PGK1*) and of the HIF-1 $\alpha$ -c-Myc pathway (*MSH2*, *MSH6*, and *NBS1*) by conventional RT-PCR (*A*) and by immunoblotting with antibodies against specified proteins as indicated (*B*). *C*, these cells were also assayed for activity of the HIF-1 $\alpha$ -ARNT pathway with an erythropoietin reporter plasmid pEpoE-luc (1). Desferrioxamine (DFO, 100  $\mu$ M overnight) served as a positive control of hypoxic induction. Relative luciferase units (RLU) were measured in triplicates and plotted in mean  $\pm$  SEM. *D*, c-Myc protein levels of these cells were determined by Western blot.



**Supplementary Figure 2.** Induction of DNA damage and microsatellite instability via the HIF-1 $\alpha$ -c-Myc pathway. *A*, transduced cells as indicated were assayed for the expression levels of  $\gamma$ -H2AX and 53BP1 in the absence and presence of 0.5- $\mu$ M doxorubicin (+Dox) for 24 h. *B*, microsatellite instability was analyzed with the genomic DNA isolated from the transduced cells using indicated markers.



**Supplementary Figure 3.** Loss of tumor-suppressing activity and gain of malignant properties arising from the HIF-1 $\alpha$ -c-Myc pathway. *A*, U-2 OS cells transduced with HIF-1 $\alpha$  variants as indicated were assayed for mRNA levels of *FHIT* and *WWOX* by conventional RT-PCR. *HIF1A* and *ACTB* genes served as controls. *B*, these cells were also assayed for the exon regions of *FHIT* and *WWOX* as specified by PCR amplification of genomic DNA. *ZEB2* genomic DNA served as control. *C*, these cells were seeded in soft agar for anchorage-independent growth. Individual colonies (top) and the entire wells (bottom) were photographed and presented. *D*, the proliferative potential of these cells was determined by a cell viability assay. Relative luciferase units (RLU) were measured in 6 replicates and plotted as mean  $\pm$  SEM.



**Supplementary Figure 4.** Gain of malignant traits in tumor cells expressing HIF-1 $\alpha$  PAS-B. *A*, transduced U-2 OS cells as indicated were assayed for proliferation in 6 replicates and presented as mean  $\pm$  SEM. *B*, transduced cells as above were assayed for anchorage-independent growth. Images of colonies are shown. *C*, tumorigenicity of transduced U-2 OS cells was determined in 10 CD-1 mice per group that were subjected to bilateral, subcutaneous injections. Ten out of 10 mice injected with U-2 OS cells expressing PAS1B developed tumors. *D*, U-118 MG cells expressing PAS1B developed fast growing tumors that invaded dermal layers in xenografts. By contrast, the parental U-118 cells and those expressing EYFP or PAS1B mutant (VAT) formed tiny, circumscribed tumors. Images are presented in hematoxylin-eosin staining with 400  $\times$  magnification.



**Supplementary Figure 4.** Requirement of HIF-1 $\alpha$  for the gain of tumorigenicity with long-term hypoxia. *A*, 5 CD-1 nude mice per group were injected subcutaneously with HIF1 $\alpha$ (PP) cells or U-2 OS cells that had been subjected to long-term hypoxia (LT Hyp) or HIF-1 $\alpha$  knockdown prior to the treatment (shHIF1A+LT Hyp), HIF-1 $\alpha$  knockdown alone, short-term hypoxia (ST Hyp), or short-term hypoxia plus days of recovery in normoxia (ST Hyp+Rec). Gain of tumorigenicity is expressed in a ratio. *B*, H-E staining of tumor specimens (T) shows hemorrhagic necrosis (N) and invasion of dermal layers (D) and skeletal muscles (M). Two representative images with 200  $\times$  magnification are shown.



**Supplementary Figure 6.** Induction of epithelial–mesenchymal transition by HIF-1 $\alpha$  PAS-B. Transduced U-2 OS cells as indicated were subjected to immunofluorescent staining with antibodies against E-cadherin (E-cad),  $\beta$ -catenin ( $\beta$ -cat), and fibronectin (FN). Cell nuclei were visualized with DAPI staining. P-C, phase-contrast microscopy.



**Supplementary Figure 7.** Induction of ZEB2 by HIF-1 $\alpha$  PAS-B for epithelial-mesenchymal transition. *A*, ZEB2 expression was upregulated at mRNA levels as determined by conventional RT-PCR in U-2 OS cells transduced with HIF-1 $\alpha$  PAS-B. Other known *CDH1* transcriptional repressors Goosecoid (GSC), TCF3, and ZEB1 were downregulated. *B* and *C*, U-2 OS cells were transfected stably with EGFP-ZEB2 fusion and assayed for the expression of E-cadherin and fibronectin at mRNA (left) and protein (right) levels (*B*), and were subjected to immunofluorescent staining for the detection of E-cadherin,  $\beta$ -catenin, and fibronectin in (*C*).



**Supplementary Figure 8.** Transduced cells expressing PAS1B were transfected with small-interfering RNA targeting *ZEB2* (si*ZEB2*) and then subjected to immunofluorescent staining with antibodies against E-cadherin (E-cad),  $\beta$ -catenin ( $\beta$ -cat), and fibronectin (FN). Cell nuclei were visualized with DAPI staining. P-C, phase-contrast microscopy.

Table S1

| Symbol  | Unigene   | GenBank   | U-2 OS | HIF1 $\alpha$ (PP) | HIF1 $\alpha$ (PP)<br>+VAT | HIF1 $\alpha$ (PP)<br>+RFC |
|---------|-----------|-----------|--------|--------------------|----------------------------|----------------------------|
| AKT1    | Hs.525622 | NM_005163 | 1.00   | 0.01               | 1.26                       | 0.00                       |
| ANGPT1  | Hs.369675 | NM_001146 | 1.00   | 5.06               | 0.77                       | 7.87                       |
| ANGPT2  | Hs.583870 | NM_001147 | 1.00   | 0.08               | 0.84                       | 0.04                       |
| APAF1   | Hs.708112 | NM_001160 | 1.00   | 0.34               | 0.93                       | 0.19                       |
| ATM     | Hs.367437 | NM_000051 | 1.00   | 0.05               | 1.10                       | 0.04                       |
| BAD     | Hs.370254 | NM_004322 | 1.00   | 0.14               | 1.62                       | 0.05                       |
| BAX     | Hs.631546 | NM_004324 | 1.00   | 42.82              | 1.35                       | 0.65                       |
| BCL2    | Hs.150749 | NM_000633 | 1.00   | 12.99              | 1.82                       | 6.82                       |
| BCL2L1  | Hs.516966 | NM_138578 | 1.00   | 0.00               | 1.29                       | 0.96                       |
| BRCA1   | Hs.194143 | NM_007294 | 1.00   | 0.01               | 1.28                       | 0.00                       |
| CASP8   | Hs.655983 | NM_001228 | 1.00   | 0.03               | 0.99                       | 0.02                       |
| CCNE1   | Hs.244723 | NM_001238 | 1.00   | 0.01               | 0.98                       | 0.00                       |
| CDC25A  | Hs.437705 | NM_001789 | 1.00   | 0.03               | 1.09                       | 0.01                       |
| CDK2    | Hs.19192  | NM_001798 | 1.06   | 0.00               | 0.90                       | 0.00                       |
| CDK4    | Hs.95577  | NM_000075 | 1.00   | 0.36               | 1.24                       | 0.17                       |
| CDKN1A  | Hs.370771 | NM_000389 | 1.00   | 0.00               | 0.97                       | 0.00                       |
| CDKN2A  | Hs.512599 | NM_000077 | 1.00   | 56.48              | 0.93                       | 14.29                      |
| CFLAR   | Hs.390736 | NM_003879 | 1.00   | 0.00               | 1.00                       | 0.00                       |
| CHEK2   | Hs.291363 | NM_007194 | 1.00   | 0.02               | 1.82                       | 0.00                       |
| COL18A1 | Hs.517356 | NM_030582 | 1.00   | 0.01               | 1.54                       | 0.01                       |
| E2F1    | Hs.654393 | NM_005225 | 1.00   | 0.68               | 1.59                       | 0.33                       |
| EPDR1   | Hs.563491 | NM_017549 | 1.00   | 0.01               | 3.18                       | 0.01                       |
| ERBB2   | Hs.446352 | NM_004448 | 1.00   | 0.01               | 1.28                       | 0.01                       |
| ETS2    | Hs.644231 | NM_005239 | 1.00   | 0.01               | 1.22                       | 0.03                       |
| FAS     | Hs.244139 | NM_000043 | 1.00   | 0.01               | 0.71                       | 0.00                       |
| FGFR2   | Hs.533683 | NM_000141 | 1.00   | 0.04               | 1.20                       | 0.02                       |
| FOS     | Hs.25647  | NM_005252 | 1.00   | 0.53               | 1.04                       | 1.01                       |

Table S1

|                |           |           |      |       |      |      |
|----------------|-----------|-----------|------|-------|------|------|
| <b>GZMA</b>    | Hs.90708  | NM_006144 | 1.00 | 0.00  | 1.03 | 0.00 |
| <b>HPRT1</b>   | Hs.412707 | NM_000194 | 1.00 | 1.00  | 1.00 | 1.00 |
| <b>HTATIP2</b> | Hs.90753  | NM_006410 | 1.00 | 0.01  | 0.95 | 0.00 |
| <b>IFNA1</b>   | Hs.37026  | NM_024013 | 1.00 | 32.39 | 1.64 | 4.67 |
| <b>IFNB1</b>   | Hs.93177  | NM_002176 | 1.00 | 2.43  | 1.81 | 2.82 |
| <b>IGF1</b>    | Hs.160562 | NM_000618 | 1.00 | 0.06  | 0.97 | 0.02 |
| <b>IL8</b>     | Hs.624    | NM_000584 | 1.00 | 0.00  | 0.96 | 0.00 |
| <b>ITGA1</b>   | Hs.696076 | NM_181501 | 1.00 | 0.01  | 1.00 | 0.01 |
| <b>ITGA2</b>   | Hs.482077 | NM_002203 | 1.00 | 0.00  | 0.88 | 0.00 |
| <b>ITGA3</b>   | Hs.265829 | NM_002204 | 1.00 | 0.00  | 1.16 | 0.00 |
| <b>ITGA4</b>   | Hs.694732 | NM_000885 | 1.00 | 0.45  | 1.40 | 0.06 |
| <b>ITGAV</b>   | Hs.436873 | NM_002210 | 1.00 | 0.00  | 1.73 | 0.00 |
| <b>ITGB1</b>   | Hs.707987 | NM_002211 | 1.00 | 0.00  | 1.18 | 0.00 |
| <b>ITGB3</b>   | Hs.218040 | NM_000212 | 1.00 | 0.03  | 1.02 | 0.00 |
| <b>ITGB5</b>   | Hs.536663 | NM_002213 | 1.00 | 0.00  | 1.19 | 0.00 |
| <b>JUN</b>     | Hs.525704 | NM_002228 | 1.00 | 0.01  | 1.55 | 0.00 |
| <b>MAP2K1</b>  | Hs.145442 | NM_002755 | 1.00 | 0.01  | 1.69 | 0.00 |
| <b>MCAM</b>    | Hs.599039 | NM_006500 | 1.00 | 0.00  | 1.89 | 0.00 |
| <b>MDM2</b>    | Hs.567303 | NM_002392 | 1.00 | 0.00  | 1.38 | 0.00 |
| <b>MET</b>     | Hs.132966 | NM_000245 | 1.00 | 0.00  | 1.30 | 0.00 |
| <b>MMP1</b>    | Hs.83169  | NM_002421 | 1.00 | 0.06  | 0.46 | 0.03 |
| <b>MMP2</b>    | Hs.513617 | NM_004530 | 1.00 | 0.02  | 1.08 | 0.02 |
| <b>MMP9</b>    | Hs.297413 | NM_004994 | 1.00 | 0.00  | 1.22 | 0.00 |
| <b>MTA1</b>    | Hs.525629 | NM_004689 | 1.00 | 1.76  | 1.68 | 0.65 |
| <b>MTA2</b>    | Hs.173043 | NM_004739 | 1.00 | 0.00  | 1.32 | 0.00 |
| <b>MTSS1</b>   | Hs.336994 | NM_014751 | 1.00 | 1.98  | 1.86 | 0.77 |
| <b>MYC</b>     | Hs.202453 | NM_002467 | 1.00 | 0.01  | 0.71 | 0.00 |
| <b>NFKB1</b>   | Hs.654408 | NM_003998 | 1.00 | 0.00  | 0.78 | 0.00 |
| <b>NFKBIA</b>  | Hs.81328  | NM_020529 | 1.00 | 0.00  | 1.18 | 0.00 |
| <b>NME1</b>    | Hs.118638 | NM_000269 | 1.00 | 1.74  | 1.44 | 0.47 |

Table S1

|                  |           |           |      |        |      |        |
|------------------|-----------|-----------|------|--------|------|--------|
| <b>NME4</b>      | Hs.9235   | NM_005009 | 1.00 | 0.01   | 1.31 | 0.00   |
| <b>PDGFA</b>     | Hs.707991 | NM_002607 | 1.00 | 0.00   | 0.79 | 0.00   |
| <b>PDGFB</b>     | Hs.1976   | NM_002608 | 1.00 | 0.03   | 1.01 | 0.00   |
| <b>PIK3R1</b>    | Hs.132225 | NM_181504 | 1.00 | 0.01   | 1.62 | 0.01   |
| <b>PLAU</b>      | Hs.77274  | NM_002658 | 1.00 | 0.00   | 0.77 | 0.00   |
| <b>PLAUR</b>     | Hs.466871 | NM_002659 | 1.00 | 0.00   | 1.30 | 0.00   |
| <b>PNN</b>       | Hs.409965 | NM_002687 | 1.00 | 1.98   | 1.24 | 0.43   |
| <b>RAF1</b>      | Hs.159130 | NM_002880 | 1.00 | 0.00   | 1.27 | 0.00   |
| <b>RB1</b>       | Hs.408528 | NM_000321 | 1.00 | 0.02   | 1.17 | 0.00   |
| <b>S100A4</b>    | Hs.654444 | NM_002961 | 1.00 | 0.00   | 1.40 | 0.01   |
| <b>SERPINB5</b>  | Hs.55279  | NM_002639 | 1.00 | 4.28   | 1.63 | 0.18   |
| <b>SERPINE1</b>  | Hs.414795 | NM_000602 | 1.00 | 0.00   | 1.26 | 0.00   |
| <b>SNCG</b>      | Hs.349470 | NM_003087 | 1.00 | 0.01   | 1.43 | 0.01   |
| <b>SYK</b>       | Hs.371720 | NM_003177 | 1.00 | 3.75   | 1.23 | 3.75   |
| <b>TEK</b>       | Hs.89640  | NM_000459 | 1.00 | 0.09   | 0.89 | 0.04   |
| <b>TERT</b>      | Hs.492203 | NM_198253 | 1.00 | 46.21  | 8.24 | 9.23   |
| <b>TGFB1</b>     | Hs.645227 | NM_000660 | 1.00 | 0.00   | 0.99 | 0.00   |
| <b>TGFBR1</b>    | Hs.494622 | NM_004612 | 1.00 | 0.12   | 1.18 | 0.05   |
| <b>THBS1</b>     | Hs.164226 | NM_003246 | 1.00 | 0.01   | 1.00 | 0.00   |
| <b>TIMP1</b>     | Hs.522632 | NM_003254 | 1.00 | 0.00   | 0.93 | 0.00   |
| <b>TIMP3</b>     | Hs.701968 | NM_000362 | 1.00 | 0.66   | 1.97 | 0.66   |
| <b>TNF</b>       | Hs.241570 | NM_000594 | 1.00 | 2.98   | 2.34 | 4.50   |
| <b>TNFRSF10B</b> | Hs.521456 | NM_003842 | 1.00 | 0.00   | 1.06 | 0.00   |
| <b>TNFRSF1A</b>  | Hs.279594 | NM_001065 | 1.00 | 0.03   | 1.36 | 0.01   |
| <b>TNFRSF25</b>  | Hs.462529 | NM_003790 | 1.00 | 0.14   | 1.59 | 0.03   |
| <b>TP53</b>      | Hs.654481 | NM_000546 | 1.00 | 0.00   | 1.02 | 0.00   |
| <b>TWIST1</b>    | Hs.66744  | NM_000474 | 1.00 | 971.74 | 1.04 | 269.04 |
| <b>VEGFA</b>     | Hs.73793  | NM_003376 | 1.00 | 0.00   | 0.38 | 0.00   |

**Table S2**

| <b>Mutagenesis</b>         |         |    |                                       |    |                     |
|----------------------------|---------|----|---------------------------------------|----|---------------------|
|                            |         |    | <b>sequences</b>                      |    |                     |
| HIF-1 $\alpha$ (F99A)      | forward | 5' | GCCTTGGATGGGCTTGTATGGTTCTCACAGATGATGC | 3' |                     |
|                            | reverse | 5' | CCATCATCTGTGAGAACCATAACAAGCCCATCCAAGG | 3' |                     |
| <b>Conventional RT-PCR</b> |         |    |                                       |    |                     |
| <b>gene</b>                |         |    | <b>sequences</b>                      |    | <b>product size</b> |
| <i>HIF1A</i>               | forward | 5' | CCGGAATTCTCAACCACAGTGCATTG            | 3' | 914 bp              |
|                            | reverse | 5' | CGGGGATCCATACGGTCTTTTGTCACTG          | 3' |                     |
| <i>MSH2</i>                | forward | 5' | TCTGACTTCTCCAAGTTTCAGG                | 3' | 390 bp              |
|                            | reverse | 5' | CTGGGCTTCTTCATATTCTGTTT               | 3' |                     |
| <i>MSH6</i>                | forward | 5' | CACGCCATCCTTGCATTACG                  | 3' | 405 bp              |
|                            | reverse | 5' | TTGCTATTGCCGTCCCATCA                  | 3' |                     |
| <i>NBS1</i>                | forward | 5' | TCTGTCAGGACGGCAGGAAAGAAA              | 3' | 584 bp              |
|                            | reverse | 5' | ACTCCTTTACAGTGGGTGCATCTT              | 3' |                     |
| <i>CA9</i>                 | forward | 5' | AGTGCCTATGAGCAGTTGCTGTCT              | 3' | 305 bp              |
|                            | reverse | 5' | GCCTCAATCACTCGCCATTCAA                | 3' |                     |
| <i>PGK1</i>                | forward | 5' | TTGGACAATGGAGCCAAGTCGGTA              | 3' | 854 bp              |
|                            | reverse | 5' | ACAATCTGCTTAGCCCGAGTGACA              | 3' |                     |
| <i>CDH1</i>                | forward | 5' | TTCCCTCGACACCCGATTCAAAGT              | 3' | 382 bp              |
|                            | reverse | 5' | TCCTTGGCCAGTGATGCTGTAGAA              | 3' |                     |
| <i>CTNNB1</i>              | forward | 5' | TGGCCATCTTTAAGTCTGGAGGCA              | 3' | 727 bp              |
|                            | reverse | 5' | AGATGACGAAGAGCACAGATGGCA              | 3' |                     |
| <i>FN1</i>                 | forward | 5' | AACTGTACATGCTTCGGTCAGGGT              | 3' | 583 bp              |
|                            | reverse | 5' | AGCTACTGGCTGTGATTTTCGGTCA             | 3' |                     |
| <i>SNAI1</i>               | forward | 5' | TACAGCGAGCTGCAGGACTCTAAT              | 3' | 447 bp              |
|                            | reverse | 5' | ACCCAGGCTGAGGTATTCCTTGTT              | 3' |                     |
| <i>SNAI2</i>               | forward | 5' | AGCCAAACTACAGCGAACTGGACA              | 3' | 511 bp              |
|                            | reverse | 5' | ACACAAGGTAATGTGTGGGTCCGA              | 3' |                     |
| <i>GSC</i>                 | forward | 5' | CCAGCATGTTTCAGCATCGACAACA             | 3' | 696 bp              |
|                            | reverse | 5' | CCAGCATGTTTCAGCATCGACAACA             | 3' |                     |
| <i>TCF3</i>                | forward | 5' | ACAGCAGCCTCTCTTCATCCACAT              | 3' | 806 bp              |
|                            | reverse | 5' | AGGGCTGGACGAGAAGTTATTGCT              | 3' |                     |
| <i>ZEB1</i>                | forward | 5' | ATGCACAACCAAGTGCAGAAGAGC              | 3' | 512 bp              |
|                            | reverse | 5' | TGCGCAAGACAAGTTCAAGGGTTC              | 3' |                     |
| <i>ZEB2</i>                | forward | 5' | AAGCTTGCCTCCAGAGCTTGACTA              | 3' | 562 bp              |

**Table S2**

|             |            |                          |    |        |
|-------------|------------|--------------------------|----|--------|
|             | reverse 5' | TTTGTGGGAGGGTTACTGTTGGGA | 3' |        |
| <i>WVOX</i> | forward 5' | CGGGATTTCACTGGCAAAGTGGTT | 3' | 382 bp |
|             | reverse 5' | AAACATCCTGGAGGAGCTGGACAA | 3' |        |
| <i>FHIT</i> | forward 5' | TTTGGCCAACATCTCATCAAGCCC | 3' | 402 bp |
|             | reverse 5' | TTCTGCTGCCATTTCTCCTCTGA  | 3' |        |
| <i>EYFP</i> | forward 5' | TGACCCTGAAGTTCATCTGCACCA | 3' | 384 bp |
|             | reverse 5' | TGTGGCGGATCTTGAAGTTCACCT | 3' |        |
| <i>ACTB</i> | forward 5' | GTGGGGCGCCCCAGGCACCA     | 3' | 539 bp |
|             | reverse 5' | CTCCTTAATGTCACGCACGATTC  | 3' |        |
|             |            |                          |    |        |

**table S3**

| genomic DNA-PCR                                                                   |      |         |           |                            |    |              |
|-----------------------------------------------------------------------------------|------|---------|-----------|----------------------------|----|--------------|
| gene                                                                              | exon |         | sequences |                            |    | product size |
| WVOX                                                                              | 4    | forward | 5'        | AGGCCAGAAGATAGATTCAGTGGG   | 3' | 524 bp       |
|                                                                                   |      | reverse | 5'        | CCTACACAGGCTTCCATGACAACA   | 3' |              |
|                                                                                   | 5    | forward | 5'        | GCTGCCCTGTTCATGGTAAGATGT   | 3' | 423 bp       |
|                                                                                   |      | reverse | 5'        | AATCTCCATATGGTTAGCCCGGCA   | 3' |              |
|                                                                                   | 6    | forward | 5'        | AGGTTTAGCAGAATCCCAGCCTCA   | 3' | 453 bp       |
|                                                                                   |      | reverse | 5'        | ATACGGTTCACCTTAACAGGGCCA   | 3' |              |
|                                                                                   | 7    | forward | 5'        | GCCCACTCAAAGCCTTGTGACATT   | 3' | 511 bp       |
|                                                                                   |      | reverse | 5'        | AAACATCCTGGAGGAGCTGGACAA   | 3' |              |
| <p><b>WVOX</b></p> <p>Ex4 Ex5 Ex6 Ex7</p> <p>1 2 3 4 5 6 7 8 9</p> <p>ATG TAA</p> |      |         |           |                            |    |              |
| FHIT                                                                              | 5    | forward | 5'        | TGGATTTGAGTTAAGGTGGCACCG-3 | 3' | 488 bp       |
|                                                                                   |      | reverse | 5'        | TTGGCTGGTTAGGCTCAGAAGACT-3 | 3' |              |
|                                                                                   | 6    | forward | 5'        | TCCTGTGGGTATGAACTGCTTGGT-3 | 3' | 461 bp       |
|                                                                                   |      | reverse | 5'        | ATCCATACTCCCACCTGCTTGGT-3  | 3' |              |
| <p><b>FHIT</b></p> <p>Ex5 Ex6</p> <p>3 4 5 6 7 8 9 10</p> <p>ATG TGA</p>          |      |         |           |                            |    |              |
| ZEB2                                                                              | 1    | forward | 5'        | ACAAAGATAGGTGGCGCGTG       | 3' | 269 bp       |
|                                                                                   |      | reverse | 5'        | ATGAAGAAGCCGCGAAGTGT       | 3' |              |
|                                                                                   | 8    | forward | 5'        | AAGCTTGCCTCCAGAGCTTGACTA   | 3' | 562 bp       |
|                                                                                   |      | reverse | 5'        | TTTGTGGGAGGGTACTGTTGGGA    | 3' |              |

**Supplementary Table 1.** Alteration of gene expression profile by transduced HIF-1 $\alpha$ .

As determined by real-time PCR arrays, fold changes of gene expression in HIF1 $\alpha$ (PP), HIF1 $\alpha$ (PP)+VAT, HIF1 $\alpha$ (PP)+RFC, and HIF1 $\alpha$ (PP)+sh*HIF1A* cells were compared in reference to the parental U-2 OS cells with *HPRT* expression for normalization. The data presented are the average of the results from two independent arrays.

Upregulation is highlighted in green with fold changes > 1.5 as cutoff, whereas downregulation is shown in red with fold changes < 0.5 as cutoff.

**Supplementary Table 2.** Primer sequences of mutagenesis and conventional RT-PCR

**Supplementary Table 3.** Primer sequences of genomic PCR
